# Supplementary material for: Sample matching by inferred agonal stress in gene expression analyses of the brain
Source: PubMed Central journal article supplement (PMC2213675; doi:10.1186/1471-2164-8-336), 2007-09-24

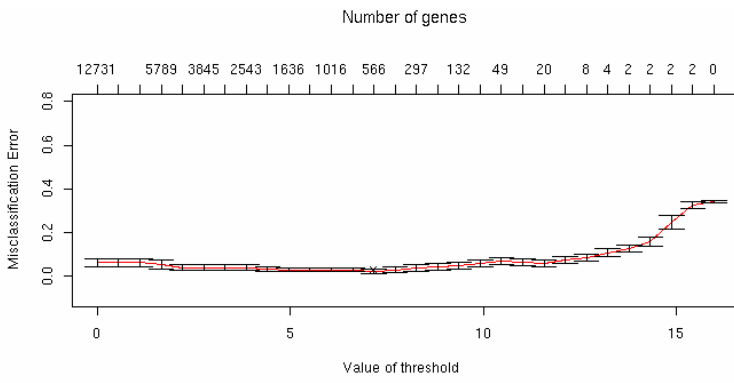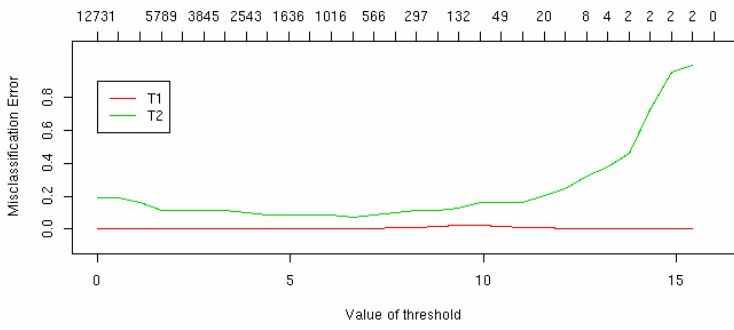

Supplement: 1471-2164-8-336-S4.pdf [file 1471-2164-8-336-S4.pdf]
