# Supplementary material for: Sample matching by inferred agonal stress in gene expression analyses of the brain
Source: PubMed Central journal article supplement (PMC2213675; doi:10.1186/1471-2164-8-336), 2007-09-24

Comparison of T1-T2 t scores between regions

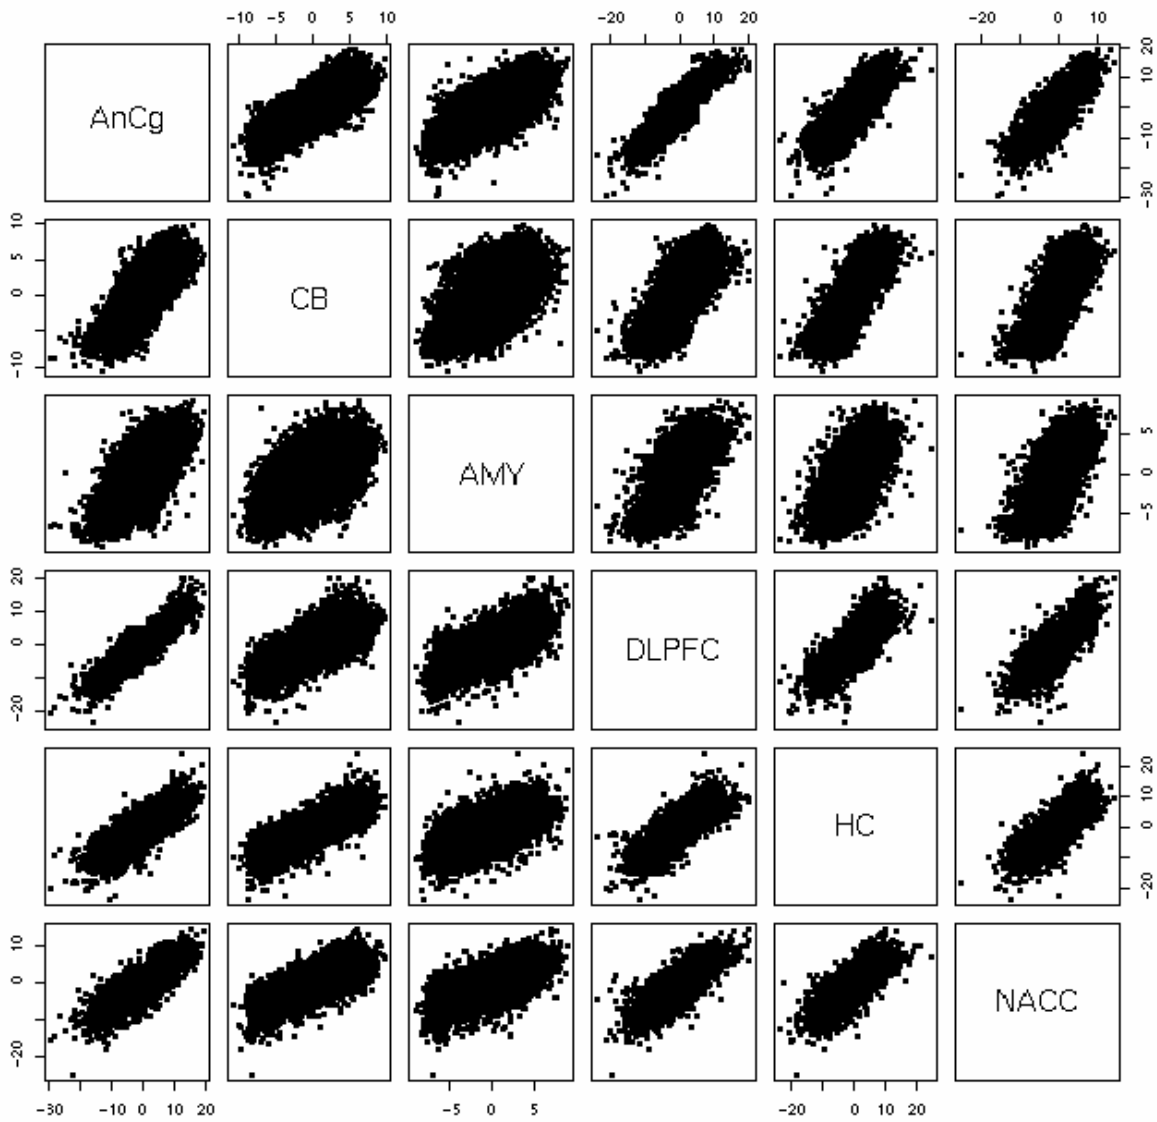

Supplement: 1471-2164-8-336-S5.pdf [file 1471-2164-8-336-S5.pdf]
